# Supplementary material for: Prognostic value of prostaglandin I2 synthase and its correlation with tumor-infiltrating immune cells in lung cancer, ovarian cancer, and gastric cancer
Source: publisher site journal article supplement (doi:10.18632/aging.103235), 2020-05-28
Supplement: Supplementary file [file aging-v12i10-103235-supplementary-material-SD1.pdf]

## SUPPLEMENTARY FIGURES

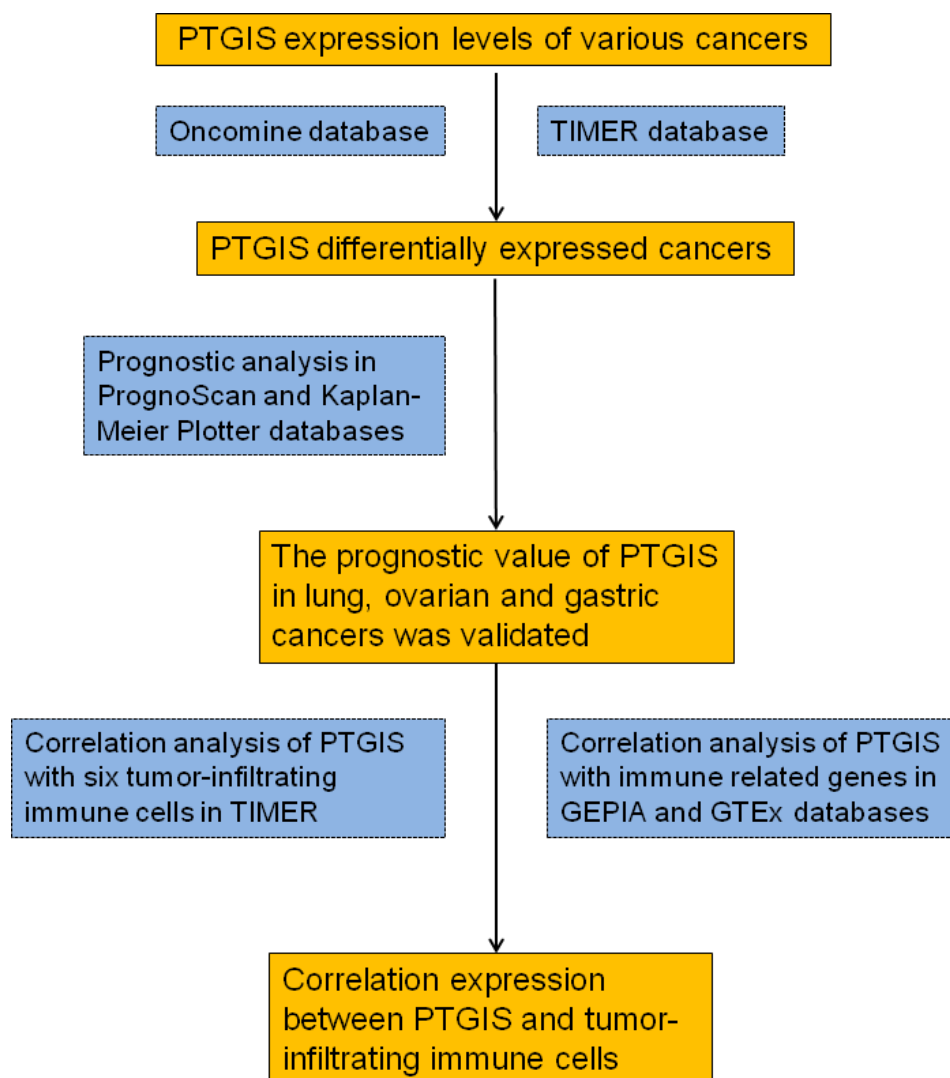

Supplementary Figure 1. Flow diagram.

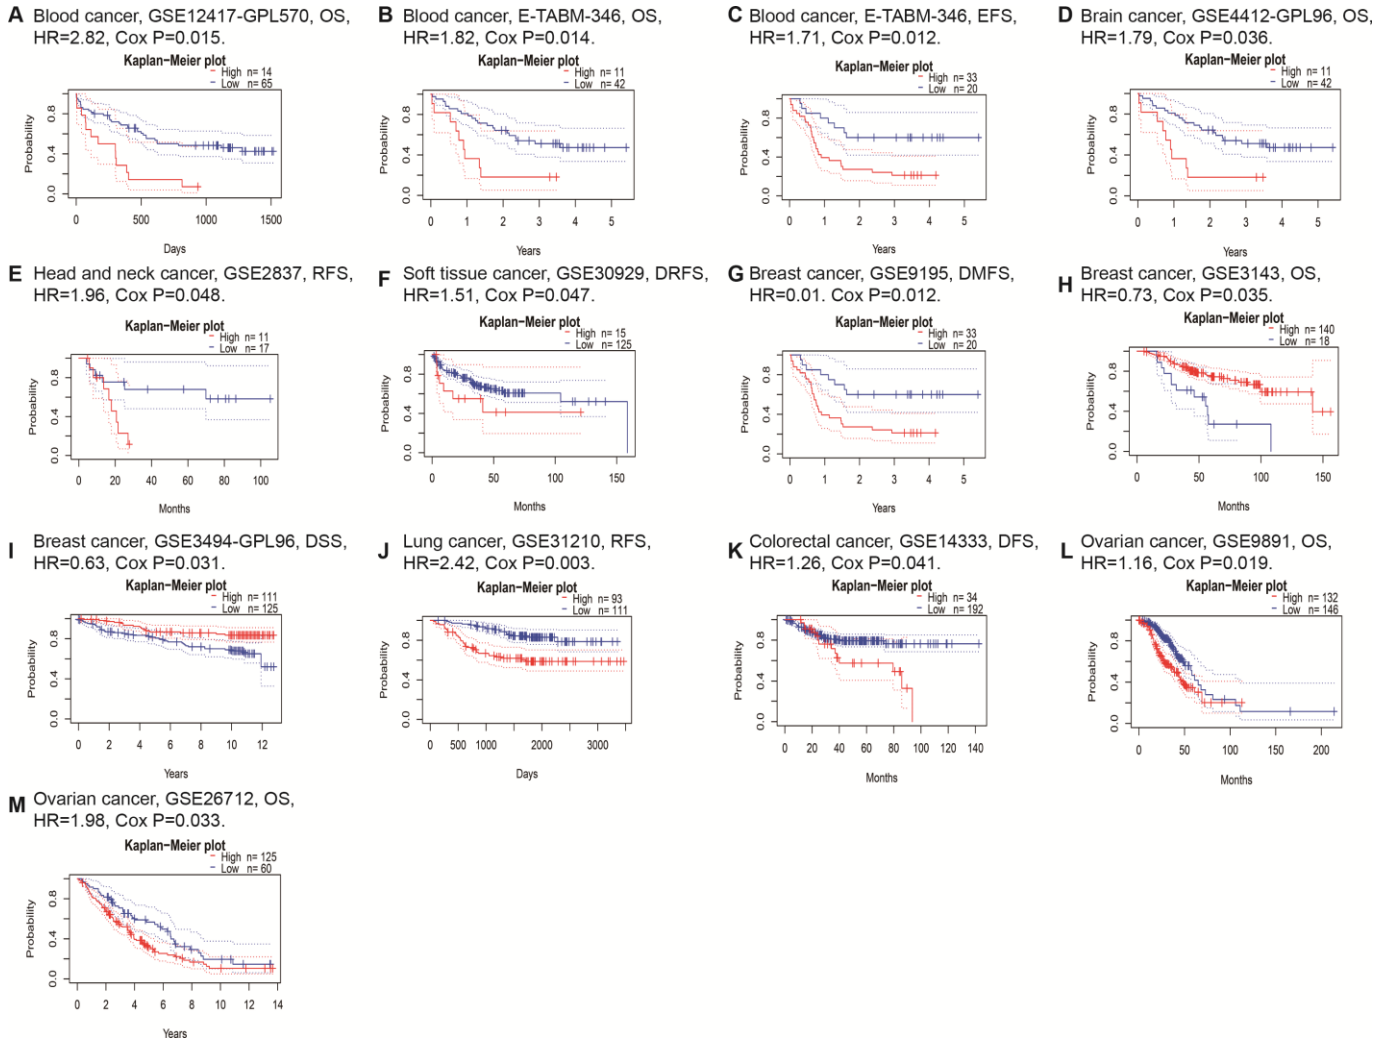

Supplementary Figure 2. Survival curves of high or low expression of PTGIS in different tumors from the PrognScan database.

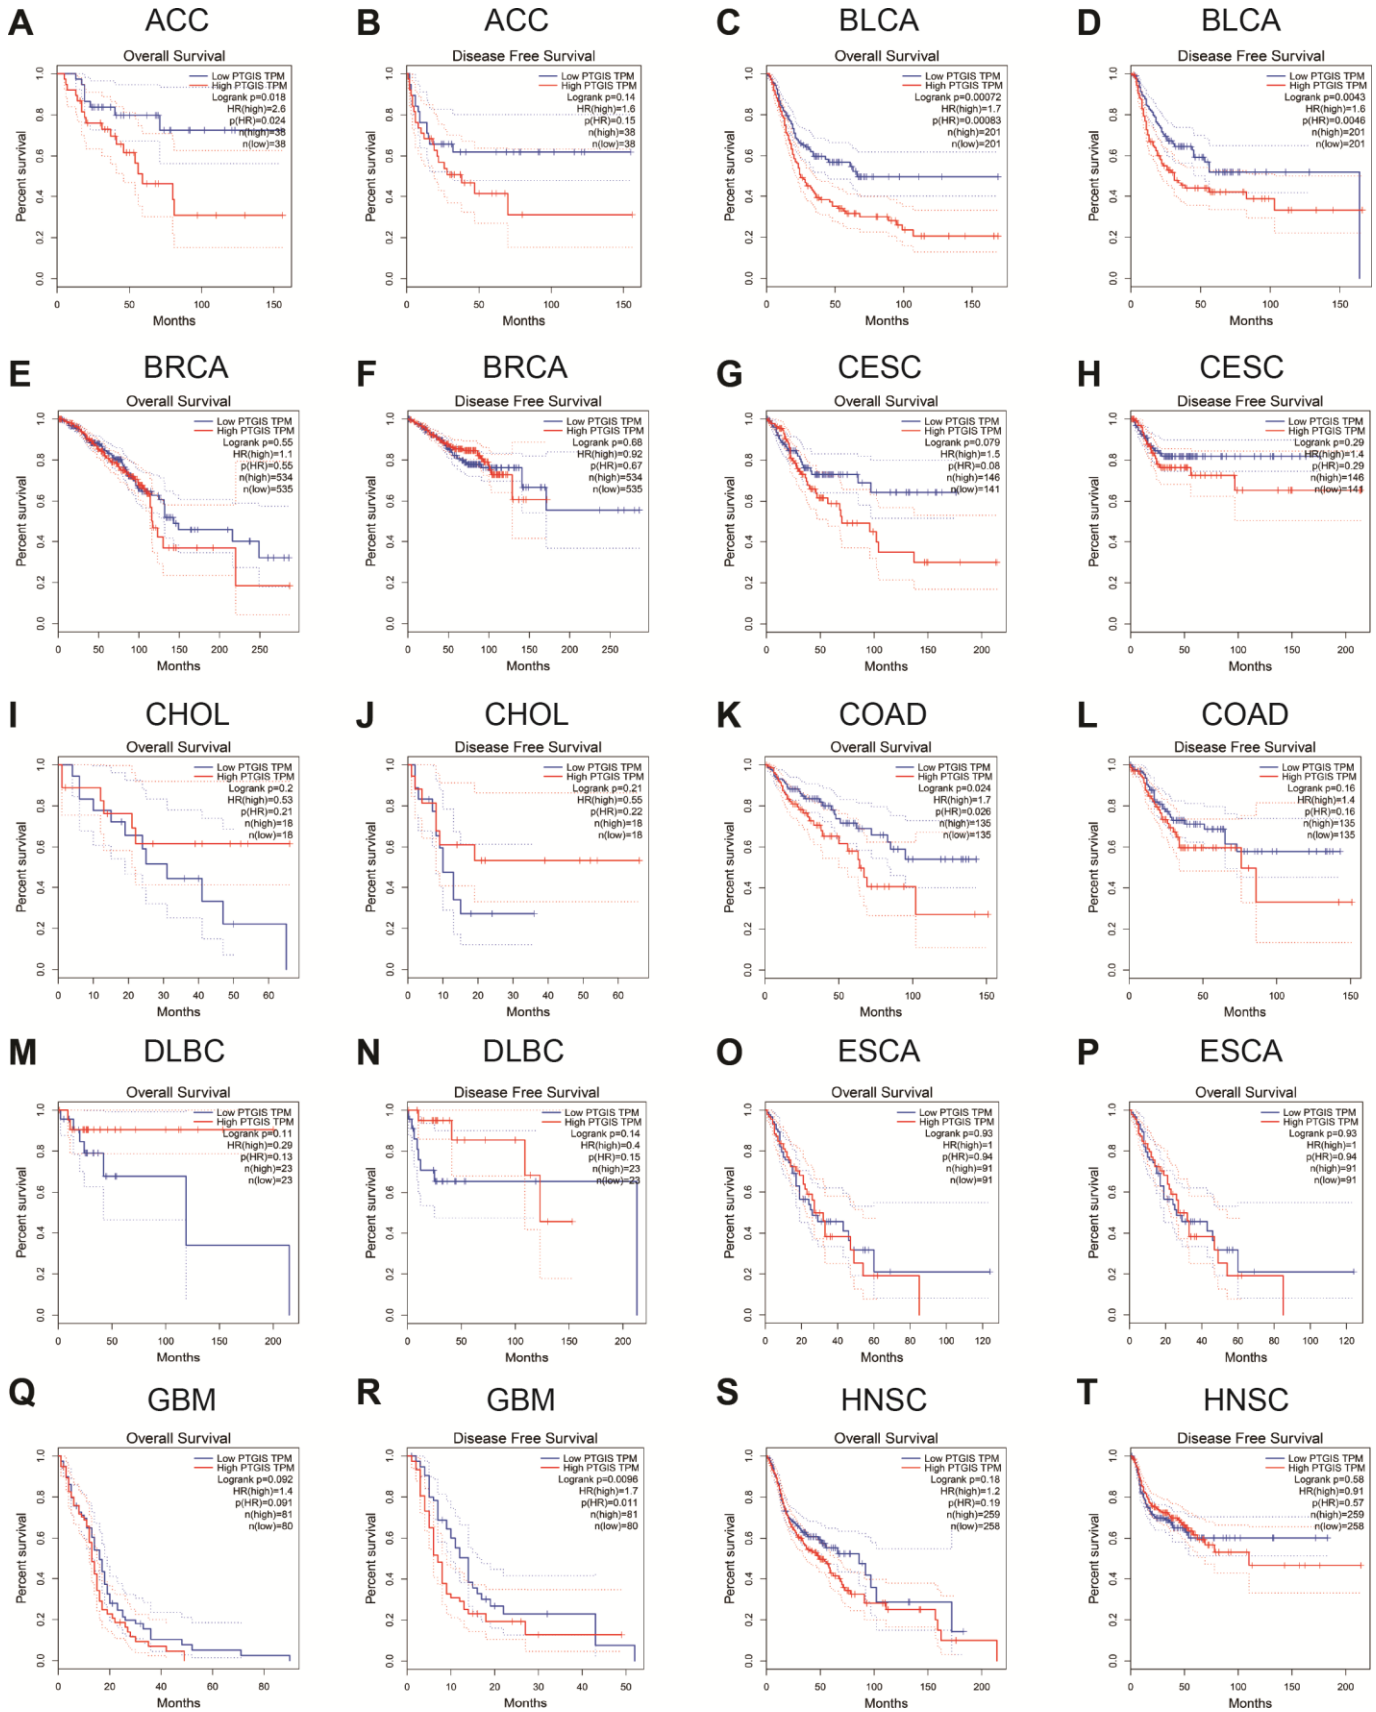

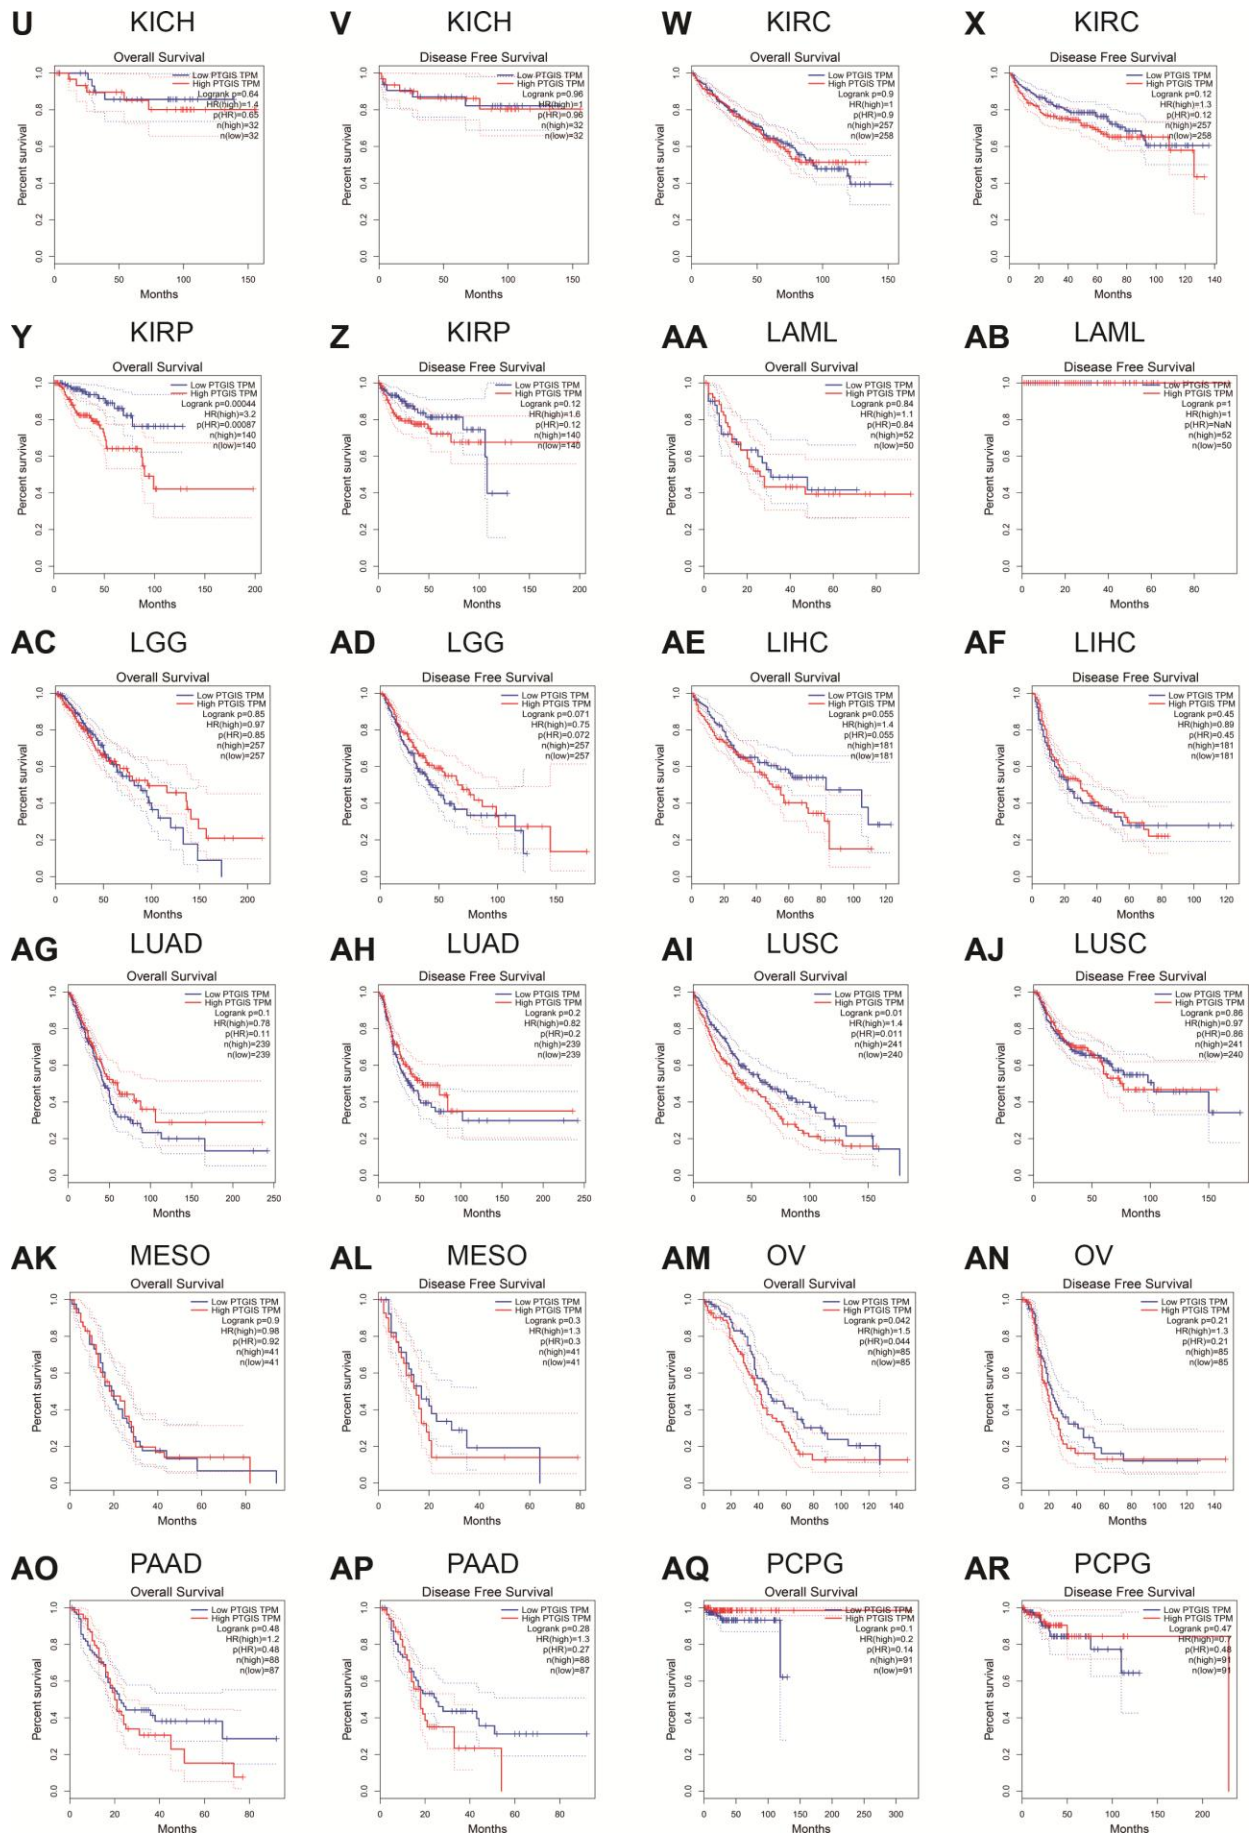

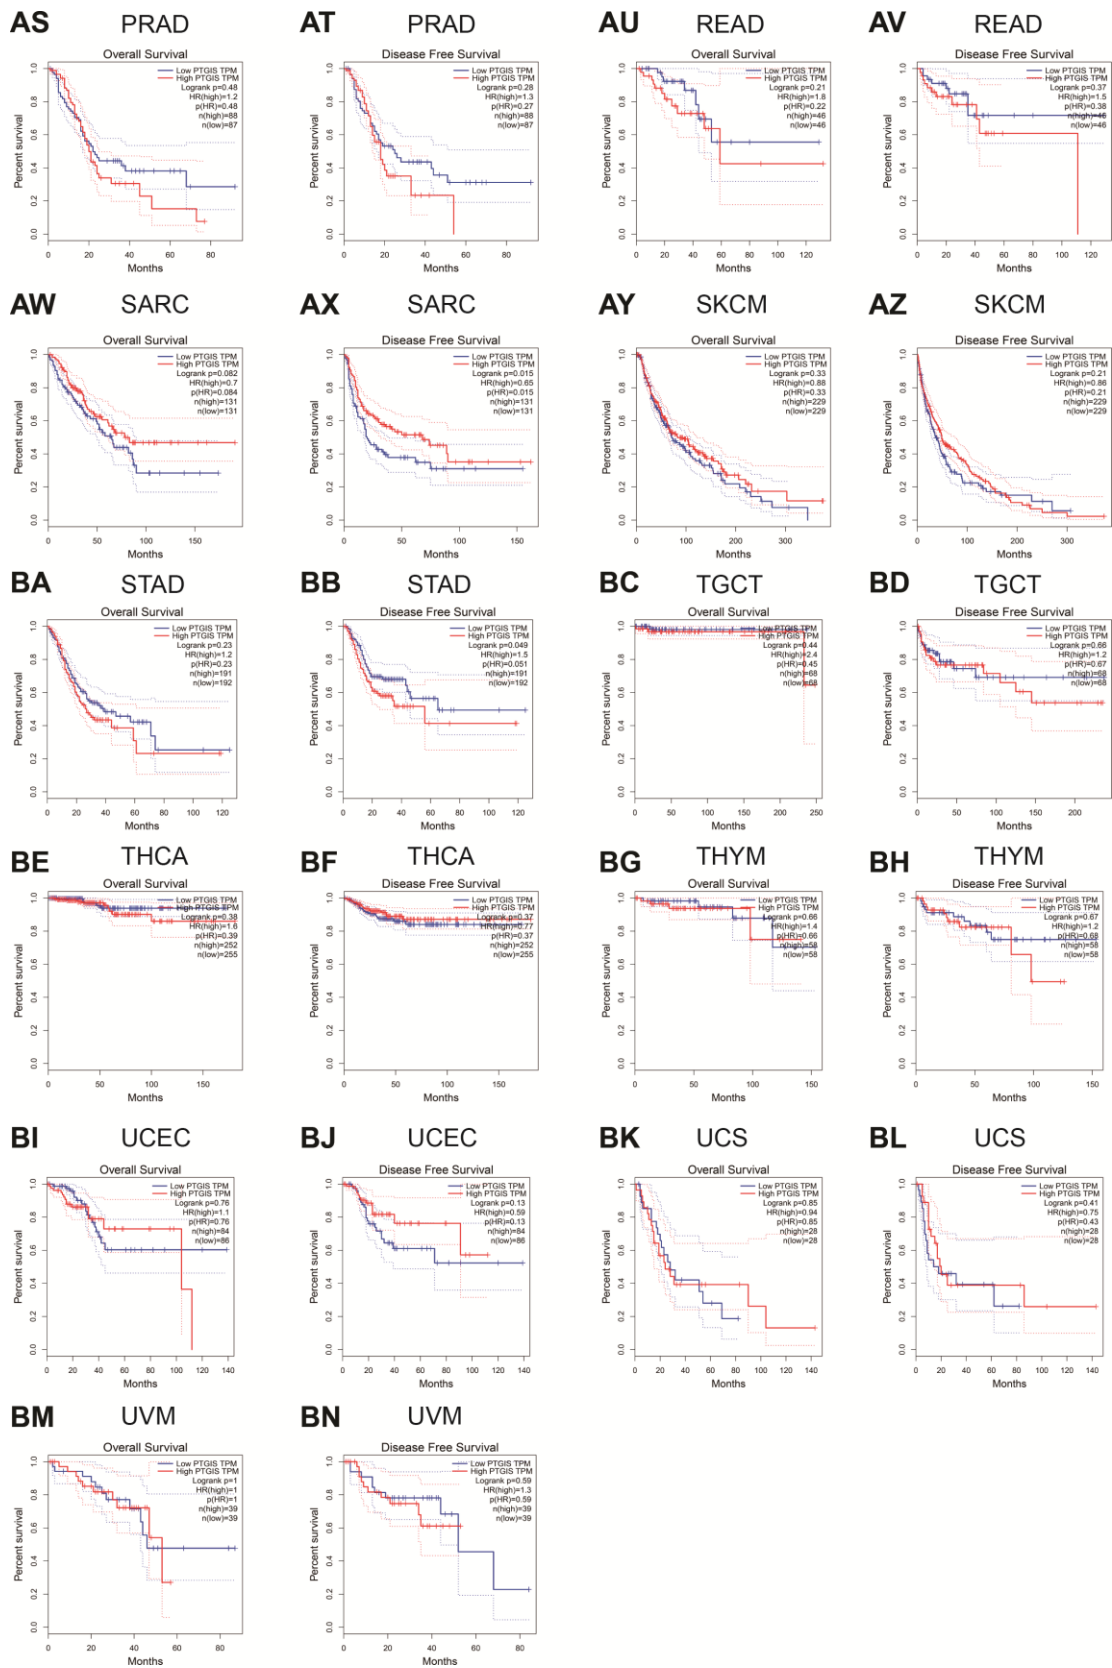

Supplementary Figure 3. Correlation of PTGIS expression with prognosis in diverse types of cancer.

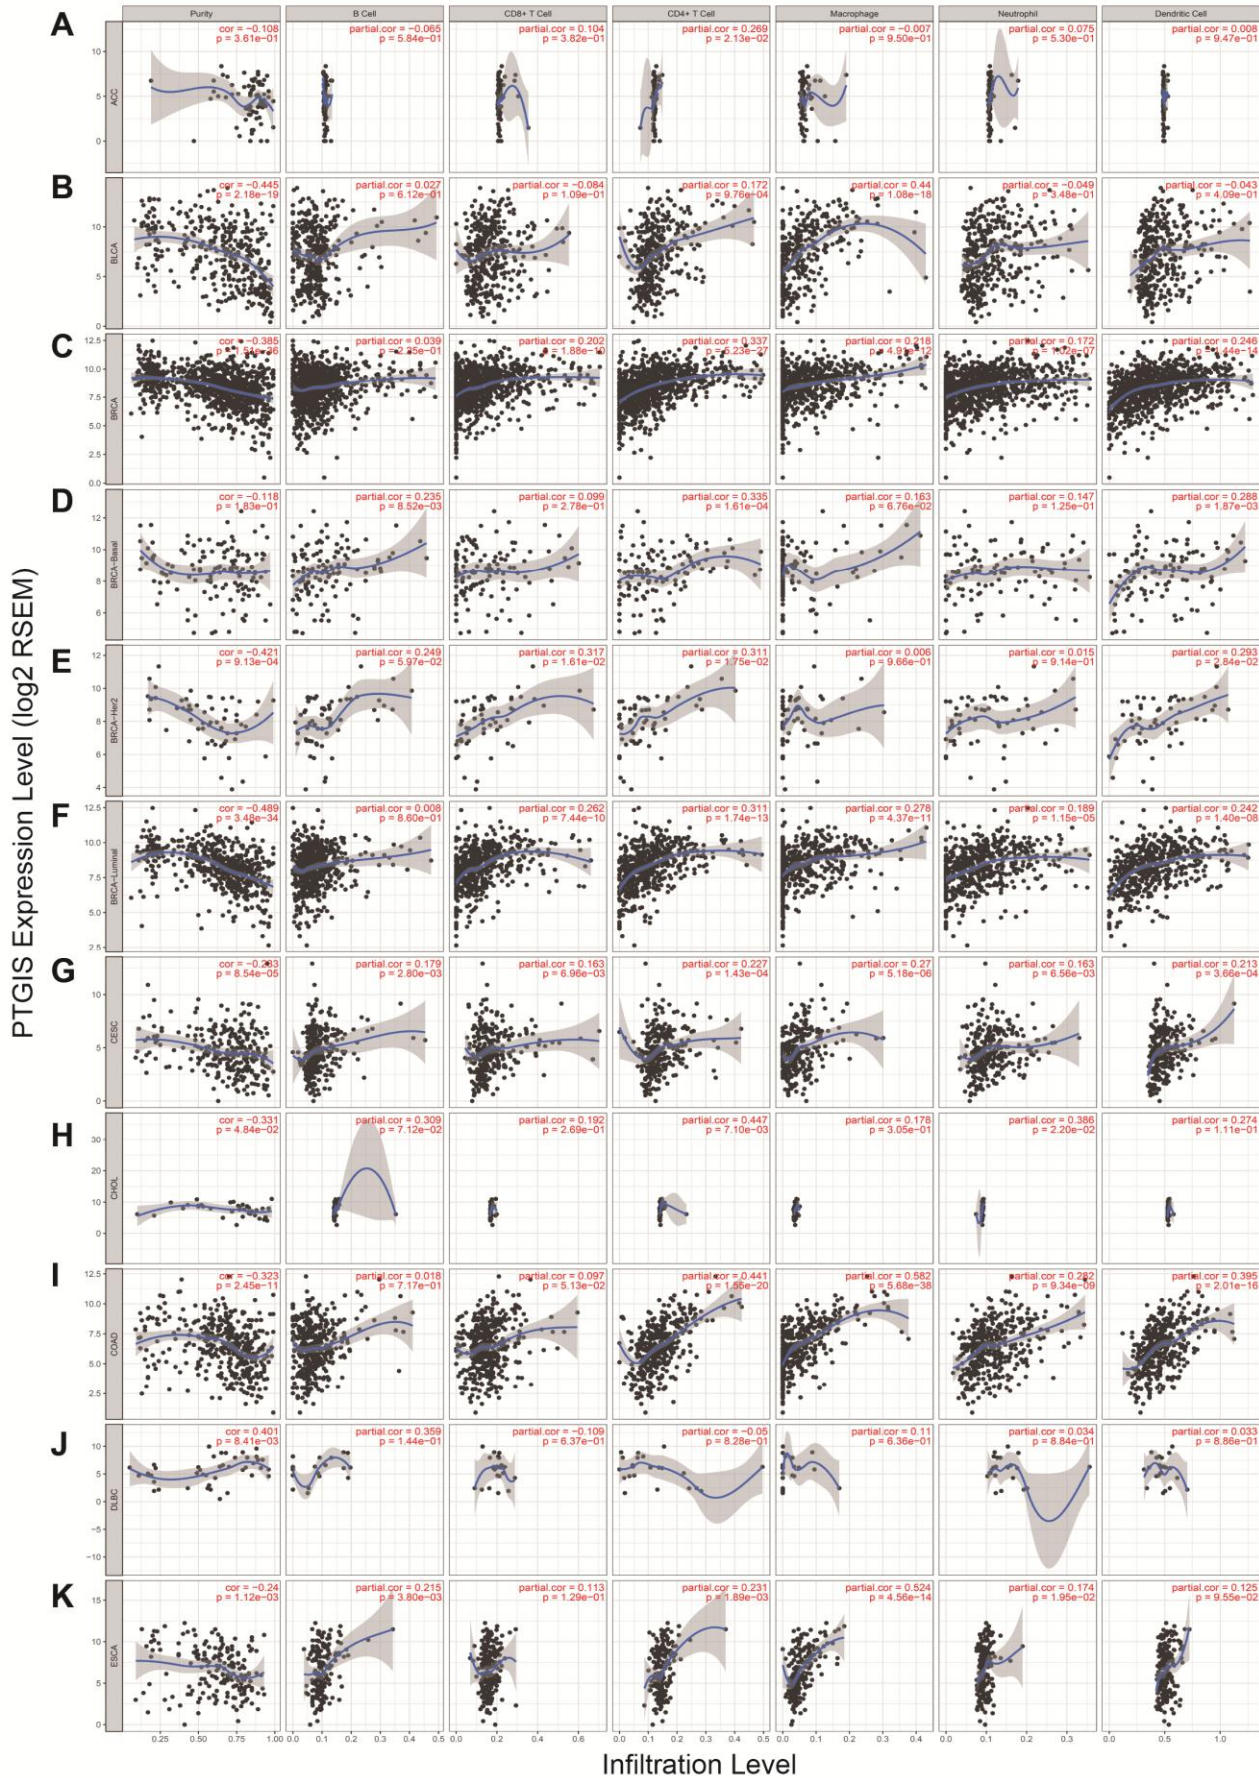

PTGIS Expression Level (log2 RSEM)

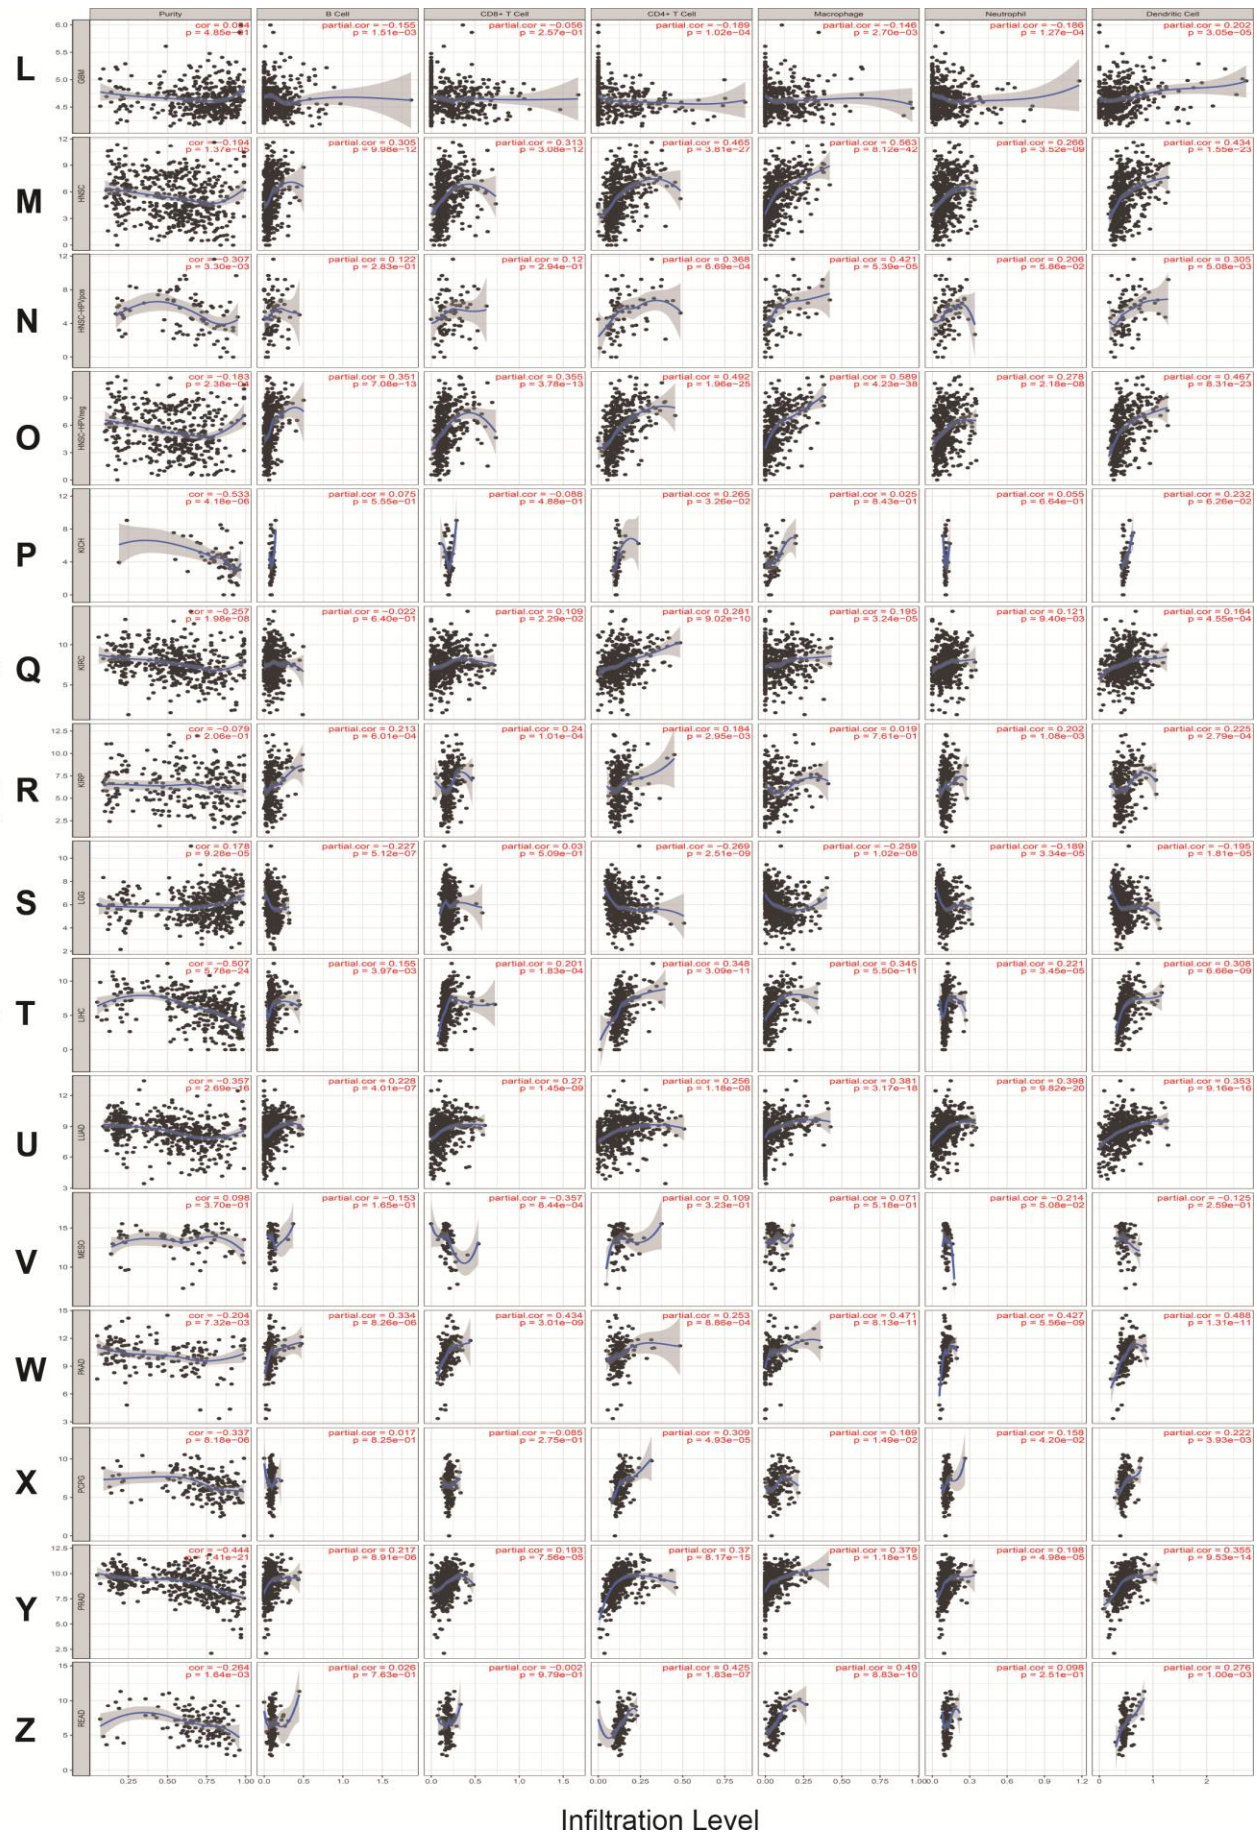

Infiltration Level

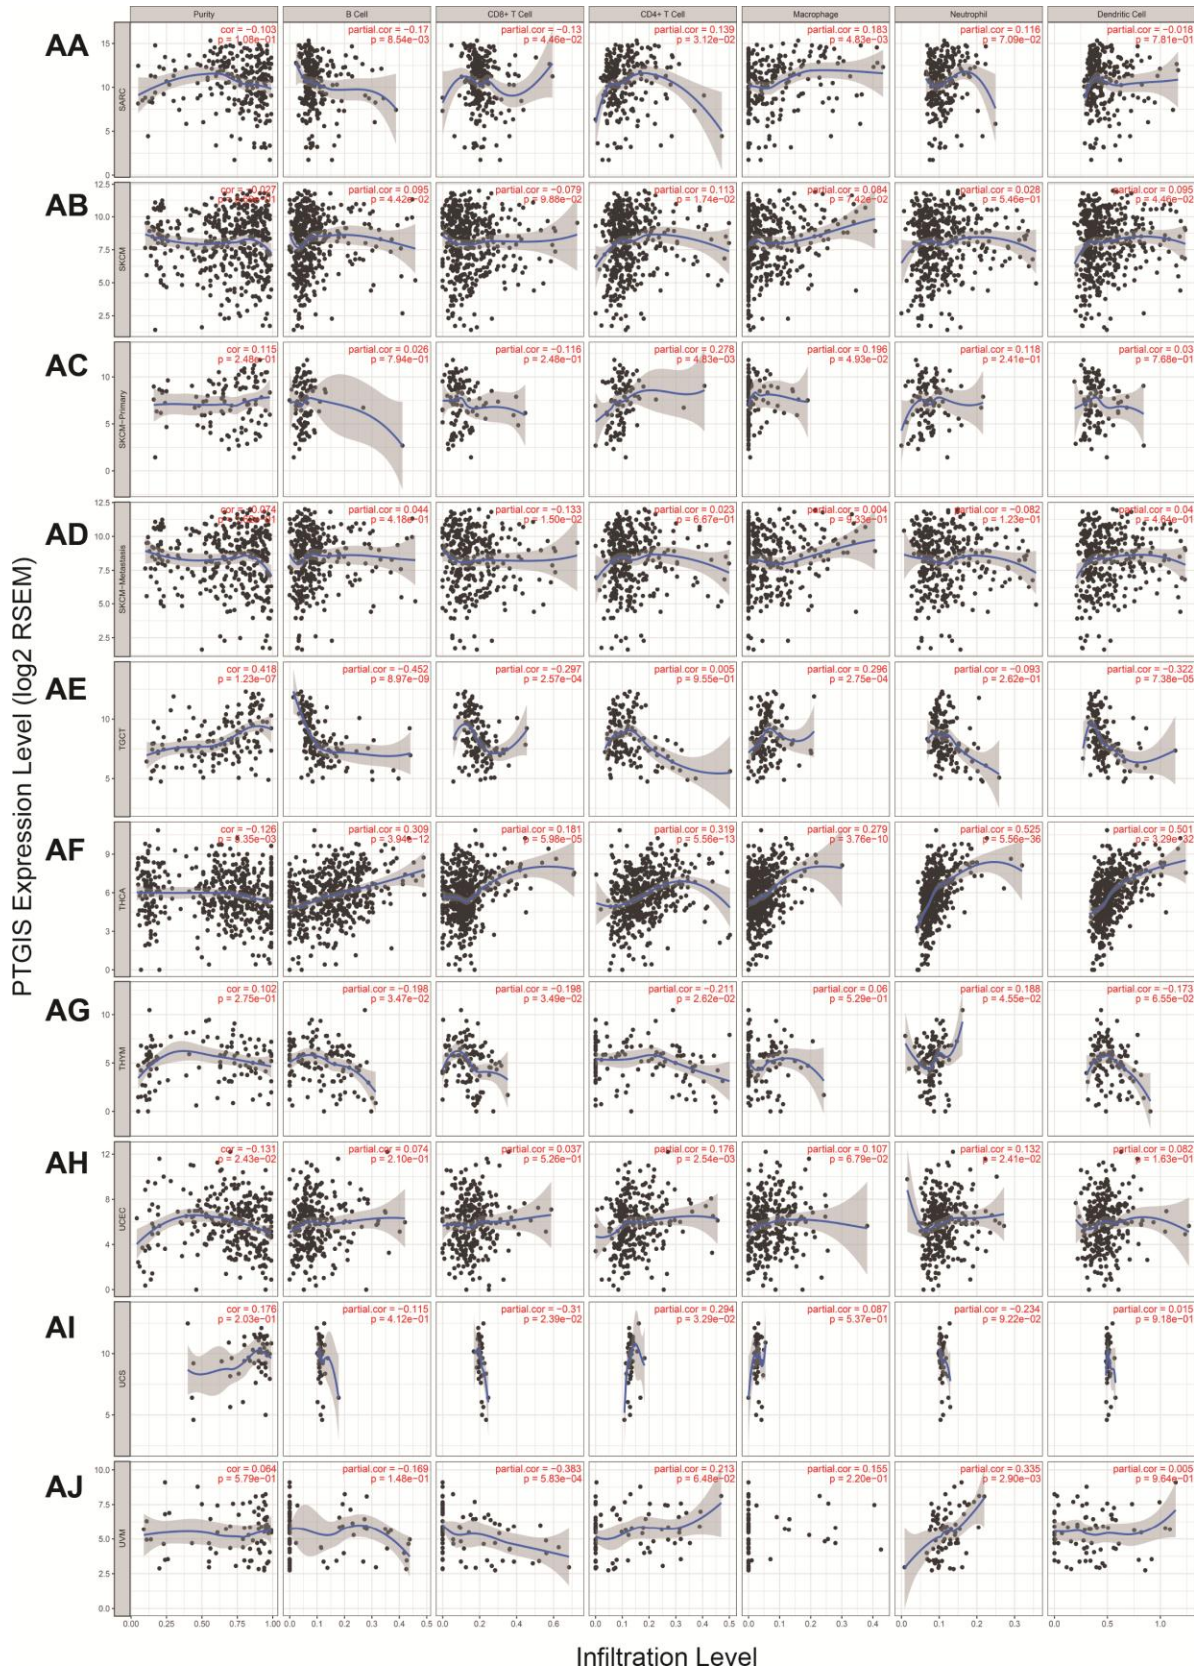

Supplementary Figure 4. Correlation of PTGIS expression with tumor-infiltrating immune cells in various types of cancers via the TIMER database.
