# Supplementary material for: Prognostic value of prostaglandin I2 synthase and its correlation with tumor-infiltrating immune cells in lung cancer, ovarian cancer, and gastric cancer
Source: publisher site journal article supplement (doi:10.18632/aging.103235), 2020-05-28
Supplement: Supplementary file [file aging-v12i10-103235-supplementary-material-SD2.pdf]

## SUPPLEMENTARY TABLES

**Supplementary Table 1. PTGIS expression in cancers vs. normal tissue in Oncomine database.**

| Cancer                           | Cancer type                                           | P-value                          | Fold change | Rank (%) | Sample | Reference (PMID) |
|----------------------------------|-------------------------------------------------------|----------------------------------|-------------|----------|--------|------------------|
| Bladder                          | Superficial Bladder Cancer                            | 8.01E-25                         | -31.339     | 1%       | 76     | 16432078         |
|                                  | Infiltrating Bladder Urothelial Carcinoma             | 7.30E-24                         | -8.600      | 1%       | 129    | 16432078         |
|                                  | Superficial Bladder Cancer                            | 1.28E-15                         | -4.420      | 1%       | 194    | 20421545         |
|                                  | Infiltrating Bladder Urothelial Carcinoma             | 2.09E-07                         | -2.889      | 4%       | 130    | 20421545         |
|                                  | Superficial Bladder Cancer                            | 7.13E-07                         | -3.141      | 4%       | 42     | 15173019         |
| Breast                           | Invasive Breast Carcinoma Stroma                      | 6.26E-14                         | 6.187       | 7%       | 59     | 18438415         |
|                                  | Ductal Breast Carcinoma                               | 1.39E-07                         | -2.352      | 1%       | 39     | 10963602         |
|                                  | Invasive Breast Carcinoma                             | 1.88E-08                         | -3.227      | 4%       | 165    | 22522925         |
|                                  | Invasive Ductal and Invasive Lobular Breast Carcinoma | 6.68E-30                         | -2.667      | 4%       | 234    | 22522925         |
|                                  | Invasive Lobular Breast Carcinoma                     | 2.97E-29                         | -2.341      | 5%       | 292    | 22522925         |
|                                  | Medullary Breast Carcinoma                            | 9.26E-12                         | -2.592      | 6%       | 176    | 22522925         |
|                                  | Invasive Ductal Breast Carcinoma                      | 1.20E-47                         | -2.943      | 6%       | 1700   | 22522925         |
|                                  | Tubular Breast Carcinoma                              | 1.25E-18                         | -2.339      | 8%       | 211    | 22522925         |
|                                  | Mucinous Breast Carcinoma                             | 7.35E-13                         | -3.019      | 9%       | 190    | 22522925         |
|                                  | Invasive Ductal Breast Carcinoma                      | 2.96E-21                         | -5.071      | 9%       | 450    | TCGA             |
|                                  | Cervical                                              | Cervical Squamous Cell Carcinoma | 1.55E-06    | -2.400   | 4%     | 56               |
| Cervical Squamous Cell Carcinoma |                                                       | 1.23E-06                         | -3.521      | 3%       | 45     | 18191186         |
| Colorectal                       | Cecum Adenocarcinoma                                  | 3.87E-10                         | -7.035      | 8%       | 44     | TCGA             |
|                                  | Rectal Adenocarcinoma                                 | 9.26E-13                         | -7.478      | 10%      | 82     | TCGA             |
| Head and Neck                    | Tongue Squamous Cell Carcinoma                        | 9.85E-07                         | -5.788      | 3%       | 57     | 19138406         |
| Kidney                           | Papillary Renal Cell Carcinoma                        | 5.43E-18                         | 4.434       | 1%       | 34     | 16115910         |
|                                  | Renal Oncocytoma                                      | 2.65E-18                         | 2.870       | 2%       | 35     | 16115910         |
|                                  | Chromophobe Renal Cell Carcinoma                      | 3.86E-06                         | 2.892       | 5%       | 29     | 16115910         |
|                                  | Clear Cell Sarcoma of the Kidney                      | 1.45E-07                         | -13.915     | 1%       | 17     | 16299227         |
| Leukemia                         | Chronic Lymphocytic Leukemia                          | 6.88E-05                         | -2.242      | 6%       | 111    | 15459216         |
| Liver                            | Cirrhosis                                             | 8.49E-13                         | 2.758       | 5%       | 77     | 19098997         |
|                                  | Hepatocellular Carcinoma                              | 5.22E-20                         | -3.308      | 2%       | 171    | 12058060         |
|                                  | Hepatocellular Carcinoma                              | 2.84E-46                         | -2.562      | 3%       | 445    | 21159642         |
|                                  | Hepatocellular Carcinoma                              | 2.91E-06                         | -2.407      | 6%       | 43     | 21159642         |
| Lung                             | Lung Adenocarcinoma                                   | 2.73E-08                         | -2.500      | 3%       | 39     | 16314486         |
|                                  | Lung Carcinoid Tumor                                  | 1.06E-07                         | -58.003     | 6%       | 37     | 11707567         |
|                                  | Lung Adenocarcinoma                                   | 2.60E-17                         | -2.314      | 4%       | 116    | 22613842         |
|                                  | Lung Adenocarcinoma                                   | 6.11E-06                         | -2.780      | 8%       | 57     | 17540040         |
|                                  | Cutaneous Melanoma                                    | 9.44E-05                         | 2.148       | 1%       | 18     | 18442402         |
| Melanoma                         | Benign Melanocytic Skin Nevus                         | 2.05E-06                         | -5.545      | 2%       | 25     | 16243793         |
|                                  | Cutaneous Melanoma                                    | 7.38E-09                         | -11.640     | 3%       | 52     | 16243793         |
|                                  | Ovarian Serous Cystadenocarcinoma                     | 3.00E-06                         | -6.836      | 3%       | 594    | TCGA             |
| Ovarian                          | Ovarian Carcinoma                                     | 3.74E-07                         | -6.303      | 8%       | 195    | 18593951         |
|                                  | Ovarian Serous Adenocarcinoma                         | 7.59E-07                         | -4.999      | 10%      | 45     | 19486012         |
|                                  | Pancreatic Ductal Adenocarcinoma                      | 9.45E-05                         | 2.826       | 1%       | 49     | 16053509         |
| Pancreatic                       | Pancreatic Ductal Adenocarcinoma                      | 3.20E-11                         | 4.660       | 3%       | 78     | 19260470         |
|                                  | Prostate Carcinoma                                    | 6.69E-07                         | -2.467      | 5%       | 87     | 22722839         |
| Prostate                         | Prostate Carcinoma                                    | 6.69E-07                         | -2.467      | 5%       | 87     | 22722839         |
| Sarcoma                          | Gastrointestinal Stromal Tumor                        | 2.23E-13                         | 9.876       | 1%       | 25     | 21447720         |
|                                  | Clear Cell Sarcoma of the Kidney                      | 1.45E-07                         | -13.915     | 1%       | 17     | 16299227         |
| Other                            | Pleural Malignant Mesothelioma                        | 1.33E-06                         | 3.368       | 2%       | 49     | 15920167         |
|                                  | Teratoma                                              | 1.05E-07                         | 3.328       | 5%       | 20     | 16424014         |

**Supplementary Table 2. Positive results associated with PTGIS expression in different cancers from Prognoscan database.**

| Cancer type          | Dataset         | Endpoint | N   | Hazard ratio (95%CI) | Cox P-value |
|----------------------|-----------------|----------|-----|----------------------|-------------|
| Blood cancer         | GSE12417-GPL570 | OS       | 79  | 2.82 [1.23 - 6.47]   | 0.015       |
|                      | E-TABM-346      | EFS      | 53  | 1.71 [1.12 - 2.59]   | 0.012       |
|                      | E-TABM-346      | OS       | 53  | 1.82 [1.13 - 2.94]   | 0.014       |
| Brain cancer         | GSE4412-GPL96   | OS       | 74  | 1.79 [1.04 - 3.09]   | 0.036       |
| Breast cancer        | GSE3143         | OS       | 158 | 0.73 [0.55 - 0.98]   | 0.035       |
|                      | GSE9195         | DMFS     | 77  | 0.01 [0.00 - 0.39]   | 0.012       |
|                      | GSE1456-GPL96   | DSS      | 159 | 0.60 [0.40 - 0.90]   | 0.013       |
|                      | GSE1456-GPL96   | OS       | 159 | 0.63 [0.44 - 0.90]   | 0.012       |
| Colorectal cancer    | GSE3494-GPL96   | DSS      | 236 | 0.63 [0.42 - 0.96]   | 0.031       |
|                      | GSE17536        | DSS      | 177 | 1.34 [1.01 - 1.77]   | 0.042       |
|                      | GSE17536        | DFS      | 145 | 1.63 [1.15 - 2.30]   | 0.006       |
| Head and neck cancer | GSE14333        | DFS      | 226 | 1.26 [1.01 - 1.58]   | 0.041       |
|                      | GSE2837         | RFS      | 28  | 1.96 [1.01 - 3.83]   | 0.048       |
| Lung cancer          | GSE31210        | RFS      | 204 | 2.42 [1.35 - 4.35]   | 0.003       |
|                      | GSE14814        | OS       | 90  | 7.50 [1.68 - 33.39]  | 0.008       |
|                      | GSE14814        | DFS      | 90  | 5.88 [1.05 - 33.10]  | 0.044       |
| Ovarian cancer       | GSE9891         | OS       | 278 | 1.16 [1.02 - 1.32]   | 0.019       |
|                      | GSE8841         | OS       | 81  | 4.00 [1.29 - 12.42]  | 0.016       |
|                      | GSE26712        | DFS      | 185 | 1.90 [1.06 - 3.40]   | 0.031       |
|                      | GSE26712        | OS       | 185 | 1.98 [1.06 - 3.70]   | 0.033       |
| Soft tissue cancer   | GSE30929        | DRFS     | 140 | 1.51 [1.00 - 2.28]   | 0.047       |

Abbreviation: OS Overall survival; DFS Disease free survival; EFS Event free survival; DMFS Distant metastasis free survival; RFS Relapse free survival; DSS Disease specific survival; CI Confidence interval

**Supplementary Table 3. Correlation of PTGIS mRNA expression and clinicopathological factors in ovarian cancer by Kaplan-Meier plotter database.**

| Variables of ovarian cancer | Overall survival (n=1657) |                  |               | Progression-free survival (n=1436) |                  |                 |
|-----------------------------|---------------------------|------------------|---------------|------------------------------------|------------------|-----------------|
|                             | N                         | Hazard ratio     | P-value       | N                                  | Hazard ratio     | P-value         |
| <b>Histology</b>            |                           |                  |               |                                    |                  |                 |
| Endometrioid                | 37                        | 2.84(0.47-17.01) | 0.2319        | 51                                 | 2.15(0.71-6.55)  | 0.1677          |
| Serous                      | 1207                      | 1.26(1.07-1.48)  | <b>0.0055</b> | 1104                               | 1.33(1.14-1.54)  | <b>0.0002</b>   |
| <b>Stage</b>                |                           |                  |               |                                    |                  |                 |
| 1                           | 74                        | 3.39(0.74-15.51) | 0.0940        | 96                                 | 2.48(0.69-8.91)  | 0.1498          |
| 2                           | 61                        | 2.39(0.51-11.23) | 0.2574        | 67                                 | 2.34(0.9-6.09)   | 0.0721          |
| 3                           | 1044                      | 1.2(1.01-1.42)   | <b>0.0398</b> | 919                                | 1.28(1.09-1.50)  | <b>0.0025</b>   |
| 4                           | 176                       | 1.39(0.92-2.11)  | 0.1159        | 162                                | 0.82(0.54-1.24)  | 0.3466          |
| <b>Grade</b>                |                           |                  |               |                                    |                  |                 |
| 1                           | 56                        | 2.44(0.9-6.59)   | 0.0698        | 37                                 | 4.93(1.61-15.08) | 0.0020          |
| 2                           | 324                       | 1.41(1.03-1.92)  | <b>0.0305</b> | 256                                | 1.96(1.41-2.72)  | <b>4.60E-05</b> |
| 3                           | 1015                      | 1.16(0.97-1.38)  | 0.0940        | 837                                | 1.24(1.05-1.48)  | 0.0123          |
| <b>TP53 mutation</b>        |                           |                  |               |                                    |                  |                 |
| Mutated                     | 506                       | 1.27(0.98-1.65)  | 0.0651        | 483                                | 1.27(0.98-1.63)  | 0.0663          |
| Wild type                   | 94                        | 2.2(1.27-3.8)    | <b>0.0040</b> | 84                                 | 1.57(0.87-2.83)  | 0.1291          |
| <b>Debulk</b>               |                           |                  |               |                                    |                  |                 |
| Optimal                     | 801                       | 1.21(0.99-1.49)  | 0.0656        | 696                                | 1.26(1.04-1.53)  | <b>0.0181</b>   |
| Suboptimal                  | 536                       | 1.26(1.03-1.54)  | <b>0.0266</b> | 459                                | 0.80(0.65-0.99)  | <b>0.0375</b>   |
| <b>Chemotherapy</b>         |                           |                  |               |                                    |                  |                 |
| contains platin             | 1409                      | 1.29(1.12-1.49)  | <b>0.0003</b> | 1259                               | 1.23(1.08-1.40)  | <b>0.0017</b>   |
| contains Taxol              | 793                       | 1.24(1.01-1.52)  | <b>0.0369</b> | 715                                | 1.28(1.08-1.52)  | <b>0.0041</b>   |
| contains Taxol+platin       | 776                       | 1.24(1.01-1.53)  | <b>0.0404</b> | 698                                | 1.28(1.08-1.53)  | <b>0.0049</b>   |
| contains Avastin            | 50                        | 2.08(0.72-6.02)  | 0.1693        | 50                                 | 1.75(0.83-3.70)  | 0.1390          |

|                      |     |                 |               |     |                 |               |
|----------------------|-----|-----------------|---------------|-----|-----------------|---------------|
| contains Docetaxel   | 108 | 1.46(0.8-2.64)  | 0.2129        | 106 | 1.96(1.13-3.39) | <b>0.0141</b> |
| contains Gemcitabine | 135 | 1.64(1.07-2.52) | <b>0.0230</b> | 131 | 1.49(0.95-2.34) | 0.0787        |
| contains Paclitaxel  | 220 | 1.53(0.97-2.42) | 0.0658        | 229 | 1.32(0.92-1.90) | 0.1346        |
| contains Topotecan   | 119 | 1.66(1.11-2.49) | <b>0.0133</b> | 118 | 1.41(0.90-2.20) | 0.1307        |

Bold values indicate P < 0.05.

**Supplementary Table 4. Correlation of PTGIS mRNA expression and clinicopathological factors in gastric cancer by Kaplan-Meier plotter database.**

| Variables of gastric cancer  | Overall survival (n=882) |                  |                 | Progression-free survival (n=646) |                 |                 |
|------------------------------|--------------------------|------------------|-----------------|-----------------------------------|-----------------|-----------------|
|                              | N                        | Hazard ratio     | P-value         | N                                 | Hazard ratio    | P-value         |
| <b>Gender</b>                |                          |                  |                 |                                   |                 |                 |
| Female                       | 236                      | 1.13(0.98-1.31)  | 0.1003          | 201                               | 2.07(1.40-3.04) | <b>0.0002</b>   |
| Male                         | 545                      | 2.18(1.75-2.70)  | <b>5.80E-13</b> | 438                               | 2.20(1.73-2.80) | <b>4.70E-11</b> |
| <b>Stage</b>                 |                          |                  |                 |                                   |                 |                 |
| 2                            | 140                      | 2.17(1.17-4.02)  | <b>0.0118</b>   | 131                               | 1.58(0.84-2.95) | 0.1499          |
| 3                            | 305                      | 2.39(1.63-3.50)  | <b>4.00E-06</b> | 186                               | 1.84(1.25-2.69) | <b>0.0015</b>   |
| 4                            | 148                      | 1.48(1.00-2.20)  | <b>0.0485</b>   | 141                               | 1.38(0.93-2.04) | 0.1114          |
| <b>Stage T</b>               |                          |                  |                 |                                   |                 |                 |
| 2                            | 241                      | 1.60(1.03-2.50)  | <b>0.0358</b>   | 239                               | 1.51(1.00-2.29) | <b>0.0495</b>   |
| 3                            | 204                      | 2.48(1.63-3.77)  | <b>1.30E-05</b> | 204                               | 1.81(1.23-2.67) | <b>0.0024</b>   |
| 4                            | 38                       | 1.82(0.72-4.62)  | <b>0.1992</b>   | 39                                | 2.13(0.95-4.76) | 0.0605          |
| <b>Stage N</b>               |                          |                  |                 |                                   |                 |                 |
| 0                            | 74                       | 2.43(0.99-5.93)  | <b>0.0453</b>   | 72                                | 2.10(0.88-5.01) | 0.0868          |
| 1                            | 225                      | 2.19(1.44-3.32)  | <b>0.0002</b>   | 222                               | 2.00(1.35-2.97) | <b>0.0005</b>   |
| 2                            | 121                      | 3.12(1.95-4.98)  | <b>5.60E-07</b> | 125                               | 2.33(1.50-3.61) | <b>1.00E-04</b> |
| 3                            | 76                       | 1.70(0.99-2.94)  | 0.0538          | 76                                | 1.75(1.01-3.02) | <b>0.0428</b>   |
| 1+2+3                        | 422                      | 2.08(1.57-2.74)  | <b>1.50E-07</b> | 423                               | 1.76(1.37-2.28) | <b>1.10E-05</b> |
| <b>Stage M</b>               |                          |                  |                 |                                   |                 |                 |
| 0                            | 444                      | 2.03(1.51-2.72)  | <b>1.80E-06</b> | 443                               | 1.64(1.26-2.14) | <b>0.0002</b>   |
| 1                            | 56                       | 1.87(1.03-3.41)  | <b>0.0372</b>   | 56                                | 0.70(0.36-1.34) | 0.2771          |
| <b>HER2 status</b>           |                          |                  |                 |                                   |                 |                 |
| negative                     | 532                      | 2.06(1.62-2.62)  | <b>1.50E-09</b> | 408                               | 1.88(1.44-2.45) | <b>2.00E-06</b> |
| positive                     | 344                      | 1.98(1.50-2.61)  | <b>7.30E-07</b> | 233                               | 2.43(1.76-3.37) | <b>3.20E-08</b> |
| <b>Lauren classification</b> |                          |                  |                 |                                   |                 |                 |
| Intestinal                   | 320                      | 2.33(1.70-3.21)  | <b>8.10E-08</b> | 263                               | 1.81(1.27-2.57) | <b>0.0009</b>   |
| Diffuse                      | 241                      | 1.75(1.22-2.52)  | <b>0.0022</b>   | 231                               | 1.54(1.09-2.17) | <b>0.0134</b>   |
| <b>Differentiation</b>       |                          |                  |                 |                                   |                 |                 |
| poorly                       | 165                      | 0.76(0.48-1.20)  | 0.2404          | 121                               | 0.66(0.38-1.12) | 0.1192          |
| moderately                   | 67                       | 3.56(1.22-10.43) | <b>0.0145</b>   | 67                                | 3.10(1.18-8.15) | <b>0.0167</b>   |

Bold values indicate P < 0.05.

**Supplementary Table 5. Correlation analysis between PTGIS and relate genes and markers of innate immunity cells in TIMER.**

| Description         | Gene markers        | LUSC   |       |       |       | OV     |       |        |       | STAD   |       |        |       |
|---------------------|---------------------|--------|-------|-------|-------|--------|-------|--------|-------|--------|-------|--------|-------|
|                     |                     | Purity |       | None  |       | Purity |       | None   |       | Purity |       | None   |       |
|                     |                     | Cor    | P     | Cor   | P     | Cor    | P     | Cor    | P     | Cor    | P     | Cor    | P     |
| Monocyte            | CD14                | 0.387  | ***   | 0.468 | ***   | -0.032 | 0.618 | 0.357  | ***   | 0.369  | ***   | 0.368  | ***   |
|                     | CD86                | 0.372  | ***   | 0.452 | ***   | -0.077 | 0.226 | 0.289  | ***   | 0.303  | ***   | 0.300  | ***   |
|                     | CD16(FCGR3A)        | 0.433  | ***   | 0.496 | ***   | 0.023  | 0.720 | 0.354  | ***   | 0.274  | ***   | 0.269  | ***   |
| TAM                 | CD68                | 0.302  | ***   | 0.392 | ***   | -0.029 | 0.653 | 0.329  | ***   | 0.123  | 0.016 | 0.136  | *     |
|                     | CCL2                | 0.456  | ***   | 0.503 | ***   | 0.034  | 0.590 | 0.325  | ***   | 0.482  | ***   | 0.486  | ***   |
|                     | CCL5                | 0.188  | ***   | 0.279 | ***   | -0.061 | 0.337 | 0.242  | ***   | 0.217  | ***   | 0.219  | ***   |
| M1 Macrophage       | INOS (NOS2)         | 0.178  | ***   | 0.168 | **    | 0.093  | 0.145 | 0.172  | *     | -0.137 | *     | -0.123 | 0.012 |
|                     | CXCL10              | 0.111  | 0.015 | 0.184 | ***   | -0.235 | **    | -0.034 | 0.556 | -0.022 | 0.671 | -0.001 | 0.982 |
|                     | TNF- $\alpha$ (TNF) | 0.048  | 0.291 | 0.152 | **    | -0.015 | 0.613 | 0.080  | 0.167 | -0.067 | 0.194 | -0.060 | 0.222 |
| M2 Macrophage       | CD206(MRC1)         | 0.442  | ***   | 0.504 | ***   | 0.157  | 0.013 | 0.421  | ***   | 0.368  | ***   | 0.367  | ***   |
|                     | CD163               | 0.471  | ***   | 0.534 | ***   | -0.092 | 0.147 | 0.398  | ***   | 0.367  | ***   | 0.366  | ***   |
|                     | IL10                | 0.342  | ***   | 0.410 | ***   | 0.211  | **    | 0.414  | ***   | 0.359  | ***   | 0.346  | ***   |
| Neutrophils         | CD66b (CEACAM8)     | 0.134  | *     | 0.158 | **    | 0.122  | 0.055 | 0.074  | 0.198 | -0.028 | 0.587 | -0.019 | 0.702 |
|                     | CD11b (ITGAM)       | 0.436  | ***   | 0.502 | ***   | -0.001 | 0.992 | 0.341  | ***   | 0.416  | ***   | 0.410  | ***   |
|                     | CCR7                | 0.343  | ***   | 0.429 | ***   | 0.058  | 0.359 | 0.301  | ***   | 0.427  | ***   | 0.413  | ***   |
|                     | CD15(FUT4)          | 0.219  | ***   | 0.247 | ***   | 0.109  | 0.086 | 0.197  | **    | -0.245 | ***   | -0.239 | ***   |
| Natural killer cell | KIR2DL1             | 0.092  | 0.046 | 0.139 | *     | 0.041  | 0.519 | 0.132  | 0.021 | 0.087  | 0.090 | 0.105  | 0.032 |
|                     | KIR2DL3             | 0.177  | **    | 0.210 | ***   | -0.026 | 0.687 | 0.064  | 0.266 | 0.025  | 0.630 | 0.067  | 0.171 |
|                     | KIR2DL4             | 0.055  | 0.235 | 0.114 | 0.011 | -0.236 | **    | 0.007  | 0.906 | -0.157 | *     | -0.141 | *     |
|                     | KIR3DL1             | 0.213  | ***   | 0.267 | ***   | 0.036  | 0.574 | 0.180  | *     | 0.064  | 0.216 | 0.086  | 0.082 |
|                     | KIR3DL2             | 0.130  | *     | 0.186 | ***   | 0.002  | 0.975 | 0.141  | 0.014 | 0.114  | 0.027 | 0.138  | *     |
|                     | KIR3DL3             | 0.071  | 0.123 | 0.095 | 0.039 | 0.034  | 0.593 | 0.059  | 0.310 | -0.135 | *     | -0.116 | 0.018 |
|                     | KIR2DS4             | 0.173  | **    | 0.207 | ***   | 0.061  | 0.336 | 0.149  | **    | 0.003  | 0.958 | 0.013  | 0.799 |
| Dendritic cell      | HLA-DPB1            | 0.399  | ***   | 0.476 | ***   | -0.142 | 0.025 | 0.169  | **    | 0.247  | ***   | 0.249  | ***   |
|                     | HLA-DQB1            | 0.253  | ***   | 0.340 | ***   | -0.052 | 0.413 | 0.161  | **    | 0.109  | 0.034 | 0.120  | 0.015 |
|                     | HLA-DRA             | 0.365  | ***   | 0.442 | ***   | -0.166 | *     | 0.104  | 0.071 | 0.127  | 0.013 | 0.134  | *     |
|                     | HLA-DPA1            | 0.407  | ***   | 0.479 | ***   | -0.148 | 0.019 | 0.136  | 0.018 | 0.174  | **    | 0.181  | **    |
|                     | BDCA-1(CD1C)        | 0.263  | ***   | 0.372 | ***   | 0.014  | 0.820 | 0.245  | ***   | 0.528  | ***   | 0.502  | ***   |
|                     | BDCA-4(NRP1)        | 0.350  | ***   | 0.427 | ***   | 0.164  | *     | 0.412  | ***   | 0.551  | ***   | 0.551  | ***   |
|                     | CD11c (ITGAX)       | 0.399  | ***   | 0.479 | ***   | -0.003 | 0.956 | 0.306  | ***   | 0.324  | ***   | 0.335  | ***   |
|                     | NKp46(NCR1)         | 0.211  | ***   | 0.263 | ***   | -0.003 | 0.962 | 0.166  | **    | 0.171  | **    | 0.188  | **    |

LUSC, lung squamous cell carcinoma; OV, ovarian serous cystadenocarcinoma; STAD, stomach adenocarcinoma; TAM, tumor-associated macrophage; Cor, R value of Spearman's correlation; None, correlation without adjustment. Purity, correlation adjusted by purity. \*P < 0.01; \*\*P < 0.001; \*\*\*P < 0.0001.

**Supplementary Table 6. Correlation analysis between PTGIS and relate genes and markers of adaptive immunity cells in TIMER.**

| Description       | Gene markers         | LUSC   |       |        |       | OV     |       |        |       | STAD   |       |        |       |
|-------------------|----------------------|--------|-------|--------|-------|--------|-------|--------|-------|--------|-------|--------|-------|
|                   |                      | Purity |       | None   |       | Purity |       | None   |       | Purity |       | None   |       |
|                   |                      | Cor    | P     | Cor    | P     | Cor    | P     | Cor    | P     | Cor    | P     | Cor    | P     |
| CD8+ T cell       | CD8A                 | 0.275  | ***   | 0.346  | ***   | 0.007  | 0.918 | 0.284  | ***   | 0.280  | ***   | 0.286  | ***   |
|                   | CD8B                 | 0.297  | ***   | 0.335  | ***   | 0.002  | 0.970 | 0.222  | **    | 0.220  | ***   | 0.215  | ***   |
| T cell (general)  | CD3D                 | 0.239  | ***   | 0.339  | ***   | -0.031 | 0.631 | 0.278  | ***   | 0.188  | **    | 0.189  | **    |
|                   | CD3E                 | 0.318  | ***   | 0.409  | ***   | 0.000  | 0.999 | 0.309  | ***   | 0.242  | ***   | 0.227  | ***   |
|                   | CD2                  | 0.307  | ***   | 0.359  | ***   | -0.014 | 0.831 | 0.293  | ***   | 0.254  | ***   | 0.247  | ***   |
| B cell            | CD19                 | 0.344  | ***   | 0.438  | ***   | -0.025 | 0.699 | -0.033 | 0.573 | 0.365  | ***   | 0.348  | ***   |
|                   | CD20(MS4A1)          | 0.334  | ***   | 0.428  | ***   | 0.164  | *     | 0.326  | ***   | 0.408  | ***   | 0.401  | ***   |
|                   | CD138(SDC1)          | -0.171 | **    | -0.152 | **    | 0.191  | *     | 0.320  | ***   | -0.290 | ***   | -0.297 | ***   |
|                   | CD23(FCER2)          | 0.343  | ***   | 0.429  | ***   | 0.213  | **    | 0.313  | ***   | 0.405  | ***   | 0.392  | ***   |
| Th1               | T-bet (TBX21)        | 0.276  | ***   | 0.361  | ***   | -0.046 | 0.467 | 0.269  | ***   | 0.255  | ***   | 0.252  | ***   |
|                   | STAT4                | 0.311  | ***   | 0.396  | ***   | 0.048  | 0.446 | 0.289  | ***   | 0.328  | ***   | 0.319  | ***   |
|                   | STAT1                | 0.046  | 0.318 | 0.119  | *     | -0.230 | **    | -0.118 | 0.041 | -0.070 | 0.172 | -0.064 | 0.196 |
|                   | IFN- $\gamma$ (IFNG) | 0.076  | 0.098 | 0.134  | *     | -0.125 | 0.049 | 0.125  | 0.029 | -0.092 | 0.074 | -0.093 | 0.057 |
|                   | TNF- $\alpha$ (TNF)  | 0.048  | 0.291 | 0.152  | **    | -0.015 | 0.613 | 0.080  | 0.167 | -0.067 | 0.194 | -0.060 | 0.222 |
| Th2               | GATA3                | 0.215  | ***   | 0.288  | ***   | 0.004  | 0.946 | 0.253  | ***   | 0.384  | ***   | 0.375  | ***   |
|                   | STAT6                | -0.063 | 0.170 | -0.033 | 0.462 | -0.100 | 0.115 | -0.110 | 0.055 | 0.122  | 0.018 | 0.129  | *     |
|                   | STAT5A               | 0.334  | ***   | 0.414  | ***   | 0.027  | 0.677 | 0.136  | 0.018 | 0.360  | ***   | 0.350  | ***   |
|                   | IL13                 | 0.177  | ***   | 0.223  | ***   | 0.053  | 0.401 | 0.072  | 0.211 | 0.131  | 0.010 | 0.130  | *     |
| Tfh               | BCL6                 | 0.019  | 0.685 | 0.000  | 0.998 | 0.000  | 0.997 | -0.027 | 0.642 | 0.530  | ***   | 0.517  | ***   |
|                   | IL21                 | 0.156  | **    | 0.213  | ***   | -0.114 | 0.073 | -0.082 | 0.154 | 0.052  | 0.312 | 0.049  | 0.318 |
|                   | CD278(ICOS)          | 0.280  | ***   | 0.374  | ***   | -0.033 | 0.606 | 0.235  | ***   | 0.130  | 0.012 | 0.132  | *     |
|                   | CXCL13               | 0.197  | ***   | 0.293  | ***   | -0.026 | 0.680 | 0.199  | **    | 0.243  | ***   | 0.236  | ***   |
| Th17              | STAT3                | 0.184  | ***   | 0.232  | ***   | 0.038  | 0.549 | 0.222  | **    | 0.363  | ***   | 0.365  | ***   |
|                   | IL17A                | 0.038  | 0.405 | 0.074  | 0.097 | -0.105 | 0.097 | 0.042  | 0.470 | -0.261 | ***   | -0.272 | ***   |
| Treg              | FOXP3                | 0.350  | ***   | 0.429  | ***   | -0.024 | 0.711 | 0.240  | ***   | 0.241  | ***   | 0.244  | ***   |
|                   | CCR8                 | 0.381  | ***   | 0.453  | ***   | -0.033 | 0.604 | 0.130  | 0.024 | 0.344  | ***   | 0.345  | ***   |
|                   | STAT5B               | 0.262  | ***   | 0.264  | ***   | 0.269  | ***   | 0.275  | ***   | 0.603  | ***   | 0.608  | ***   |
|                   | TGF $\beta$ (TGFB1)  | 0.084  | 0.067 | 0.181  | ***   | 0.169  | *     | 0.472  | ***   | 0.527  | ***   | 0.528  | ***   |
|                   | CD25(IL2RA)          | 0.346  | ***   | 0.429  | ***   | 0.200  | *     | 0.450  | ***   | 0.187  | **    | 0.197  | ***   |
| T cell exhaustion | PD-1 (PDCD1)         | 0.271  | ***   | 0.356  | ***   | -0.106 | 0.096 | 0.200  | **    | 0.147  | *     | 0.158  | *     |
|                   | CTLA4                | 0.253  | ***   | 0.349  | ***   | -0.044 | 0.490 | 0.240  | ***   | 0.088  | 0.087 | 0.092  | 0.062 |
|                   | LAG3                 | 0.128  | *     | 0.206  | ***   | -0.169 | *     | 0.051  | 0.373 | 0.075  | 0.145 | 0.080  | 0.103 |
|                   | TIM-3 (HAVCR2)       | 0.390  | ***   | 0.464  | ***   | -0.036 | 0.572 | 0.336  | ***   | 0.291  | ***   | 0.294  | ***   |
|                   | GZMB                 | 0.144  | *     | 0.236  | ***   | -0.068 | 0.282 | 0.203  | **    | -0.089 | 0.085 | -0.064 | 0.194 |

LUSC, lung squamous cell carcinoma; OV, ovarian serous cystadenocarcinoma; STAD, stomach adenocarcinoma; Th, T helper cell; Tfh, Follicular helper T cell; Treg, regulatory T cell; Cor, R value of Spearman's correlation; None, correlation without adjustment. Purity, correlation adjusted by purity. \*P < 0.01; \*\*P < 0.001; \*\*\*P < 0.0001.

**Supplementary Table 7. Correlation analysis between PTGIS and immune relate genes of monocyte and macrophages in GEPIA.**

| Description          | Gene markers        | LUSC   |       |       |     | OV     |       |       |       | STAD   |       |        |       |
|----------------------|---------------------|--------|-------|-------|-----|--------|-------|-------|-------|--------|-------|--------|-------|
|                      |                     | Normal |       | Tumor |     | Normal |       | Tumor |       | Normal |       | Tumor  |       |
|                      |                     | R      | P     | R     | P   | R      | P     | R     | P     | R      | P     | R      | P     |
| <b>Monocyte</b>      | CD14                | 0.011  | 0.86  | 0.49  | *** | 0.46   | ***   | 0.41  | ***   | 0.67   | ***   | 0.40   | ***   |
|                      | CD86                | -0.011 | 0.86  | 0.46  | *** | 0.41   | ***   | 0.36  | ***   | 0.49   | ***   | 0.33   | ***   |
|                      | CD16(FCGR3A)        | 6E-04  | 0.99  | 0.52  | *** | 0.42   | ***   | 0.43  | ***   | 0.51   | ***   | 0.30   | ***   |
| <b>TAM</b>           | CD68                | -0.11  | 0.052 | 0.42  | *** | 0.39   | **    | 0.4   | ***   | 0.44   | ***   | 0.19   | ***   |
|                      | CCL2                | 0.085  | 0.150 | 0.51  | *** | 0.43   | ***   | 0.31  | ***   | 0.66   | ***   | 0.51   | ***   |
|                      | CCL5                | 0.22   | **    | 0.27  | *** | 0.21   | 0.044 | 0.2   | ***   | -0.27  | **    | 0.23   | ***   |
| <b>M1 Macrophage</b> | INOS (NOS2)         | 0.19   | *     | 0.18  | *** | -0.084 | 0.440 | 0.36  | ***   | 0.63   | ***   | -0.086 | 0.081 |
|                      | CXCL10              | 0.22   | **    | 0.17  | **  | -0.18  | 0.095 | 0.018 | 0.710 | 0.03   | 0.690 | 0.023  | 0.640 |
|                      | TNF- $\alpha$ (TNF) | 0.039  | 0.51  | 0.15  | **  | 0.13   | 0.240 | 0.16  | 0.001 | 0.27   | **    | -0.007 | 0.890 |
| <b>M2 Macrophage</b> | CD206(MRC1)         | -0.06  | 0.33  | 0.53  | *** | 0.37   | **    | 0.51  | ***   | 0.67   | ***   | 0.40   | ***   |
|                      | CD163               | -0.13  | 0.033 | 0.53  | *** | 0.32   | *     | 0.36  | ***   | 0.60   | ***   | 0.37   | ***   |
|                      | IL10                | 0.029  | 0.620 | 0.42  | *** | 0.44   | ***   | 0.49  | ***   | 0.62   | ***   | 0.38   | ***   |

LUSC, lung squamous cell carcinoma; OV, ovarian serous cystadenocarcinoma; STAD, stomach adenocarcinoma. TAM, Tumor-associated macrophages. Tumor, correlation analysis in tumor tissue of TCGA. Normal, correlation analysis in normal tissue of GTEx. \*P < 0.01; \*\*P < 0.001; \*\*\*P < 0.0001.
